# Supplementary material for: Functionalizing gold with single strand DNA: novel insight into optical properties via combined spectroscopic ellipsometry and nanolithography measurements
Source: Royal Society of Chemistry journal article supplement (doi:10.1039/c8sm02589d), 2019-01-01
Supplement: c8sm02589d1.pdf [file c8sm02589d1.pdf]

## Supplementary Information for

# Functionalizing gold with single strand DNA: novel insight into optical properties via combined Spectroscopic Ellipsometry and nanolithography measurements

Giulia Pinto<sup>a</sup>, Pietro Parisse<sup>b\*</sup>, Ilaria Solano<sup>a</sup>, Paolo Canepa<sup>a</sup>, Maurizio Canepa<sup>a</sup>, Loredana Casalis<sup>b</sup>, Ornella Cavalleri<sup>a\*</sup>

SE dynamic spectra were recorded to monitor the addition of MCH. Figure S1 shows the SE dynamic  $\Psi$  spectra in the UV and in the NIR after addition of MCH.

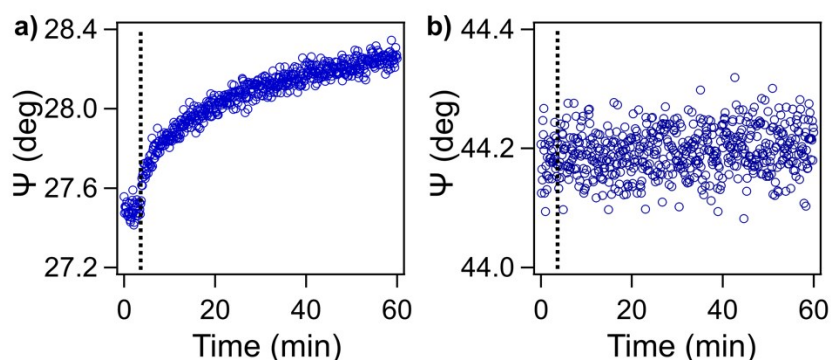

**Figure S1** SE dynamic  $\Psi$  spectra at (a) 350 nm and (b) 800 nm. The dotted line marks the injection of MCH in the cell.

$C_6$ -ssDNA data have been analysed through the comparison with simulations based on a 3-layer model (ambient|layer|substrate) (Fig. S2a-b) and on a 4-layer model (ambient|layer|interface|substrate) (Fig. S2c-d). Within the 3-layer model, assuming the AFM thickness of the  $C_6$ -ssDNA layer ( $d_L=3$  nm) as reference, we obtained a satisfactory agreement between  $C_6$ -ssDNA  $\delta_1\Delta$  experimental data (red crosses) and simulations using  $A=1.42$  ( $B=0.003 \mu\text{m}^2$ ) (Fig. S2a). Curves calculated with the same  $A$  and  $B$  values but changing the film thickness ( $d_L=2$  nm and 4 nm) are shown for useful comparison. We note that, as expected, the 3-layer model can not account for negative  $\delta_1\Psi$  values (Fig. S2b). Simulations obtained with the 4-layer model allow to reproduce the negative  $\delta_1\Psi$  values (Fig. S2d), indicating the importance of the interface layer for a reliable optical modelling of the system. Within the 4-layer model a very low index mismatch between film and ambient ( $A\sim 1.30$ ) is required. Assuming the AFM thickness ( $d_f=3$  nm) as reference,  $A$  values between 1.30 and 1.31 should be needed to reproduce  $\delta_1\Delta$  experimental data (Fig. S2c).

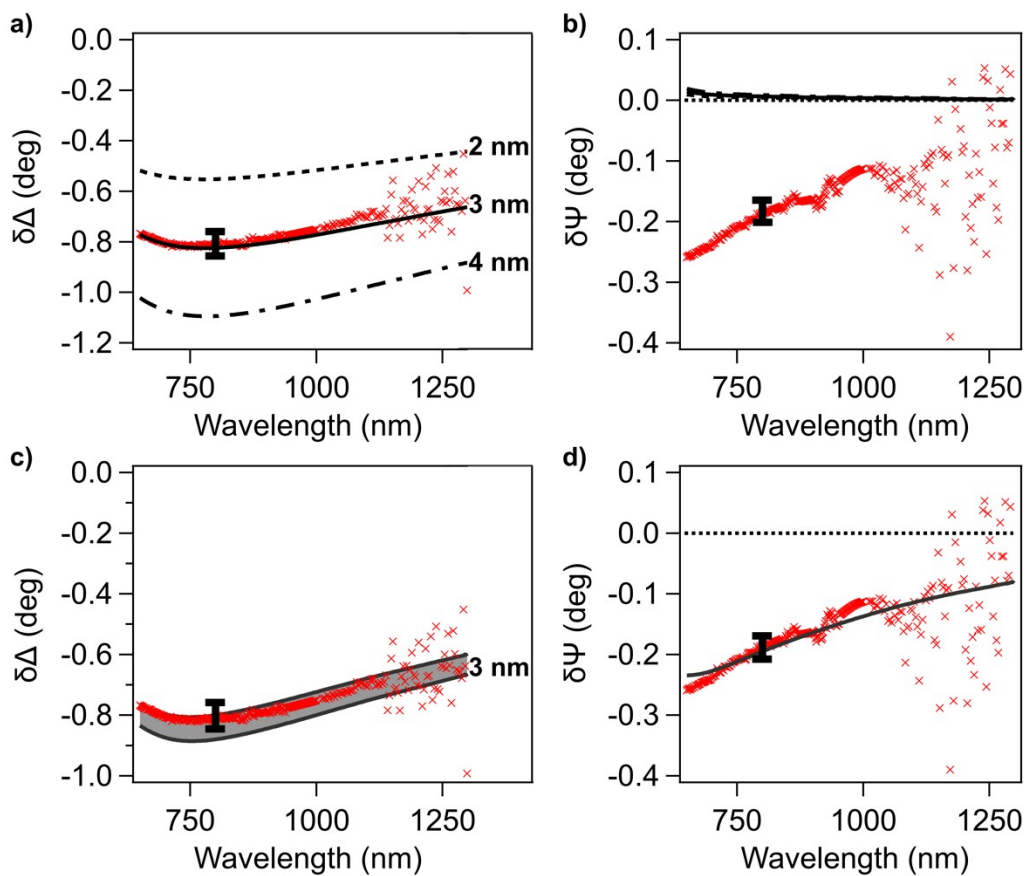

**Figure S2** (a-b) Comparison between NIR SE  $\delta$ -data for  $C_6$ -ssDNA (red crosses) and simulations (black lines) obtained with the 3-layer model:  $A=1.42$ ,  $B=0.003 \mu\text{m}^2$  and for  $d_L=2 \text{ nm}$ ,  $3 \text{ nm}$  and  $4 \text{ nm}$ . (c-d) Comparison between NIR SE  $\delta$ -data for  $C_6$ -ssDNA (red crosses) and simulations (black lines) obtained with the 4-layer model for  $d_F=3 \text{ nm}$  and Cauchy A-coefficient values comprised between 1.30 (top border) and 1.31 (bottom border),  $B=0.02 \mu\text{m}^2$ . Error bars take into account the sample to sample variability (about 20%).

Figure S3 shows the refractive index of the Cauchy layer used in the 4-layer simulations for  $C_6$ -ssDNA/MCH film.

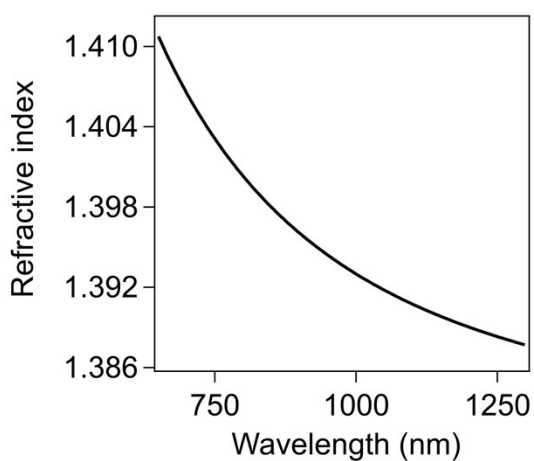

**Figure S3** Refractive index in 650-1300 nm range for a Cauchy film with  $A=1.38$  and  $B=0.013 \mu\text{m}^2$  (parameters used for the 4-layer simulation of the  $C_6$ -ssDNA/MCH film).

Figure S4 compares the experimental data for C<sub>6</sub>-ssDNA SAM and C<sub>6</sub>-ssDNA/MCH SAM with a 4-layer simulation (d<sub>F</sub>=1 nm, A=1.47), which is intended to model an ideally compact MCH layer (green dashed line). The comparison indicates that exposure to MCH does not simply results in the replacement of weakly bound ss-DNA by MCH but promotes reorganization in the whole film.

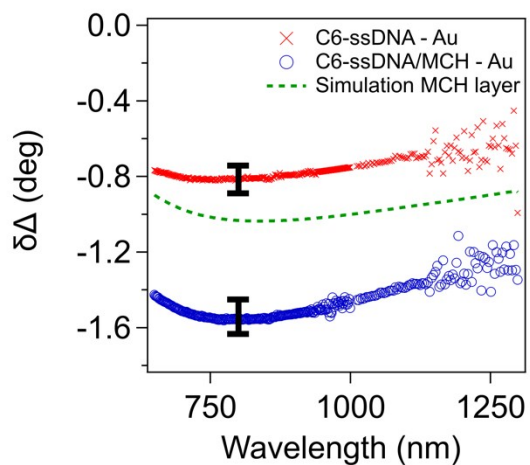

**Figure S4** Comparison between NIR SE  $\delta$ -data for C<sub>6</sub>-ssDNA (red crosses), C<sub>6</sub>-ssDNA/MCH (blue circles) and simulation for a MCH layer (d<sub>F</sub>=1 nm, A=1.47, B=0.013  $\mu\text{m}^2$ ). Error bars take into account the sample to sample variability (about 20% for C<sub>6</sub>-ssDNA, about 25% for C<sub>6</sub>-ssDNA/MCH).
